# Supplementary material for: Towards optimised extracellular vesicle proteomics from cerebrospinal fluid
Source: Springer Nature journal article supplement (doi:10.1038/s41598-023-36706-z), 2023-06-12
Supplement: MOESM1 [file 41598_2023_36706_MOESM1_ESM.pdf]

# Supplementary figures

## Towards optimised extracellular vesicle proteomics from cerebrospinal fluid

Petra Kangas, Tuula A. Nyman, Liisa Metsähonkala, Cameron Burns, Robert Tempest, Tim Williams, Jenni Karttunen\* and Tarja S. Jokinen\*

\*Shared last author

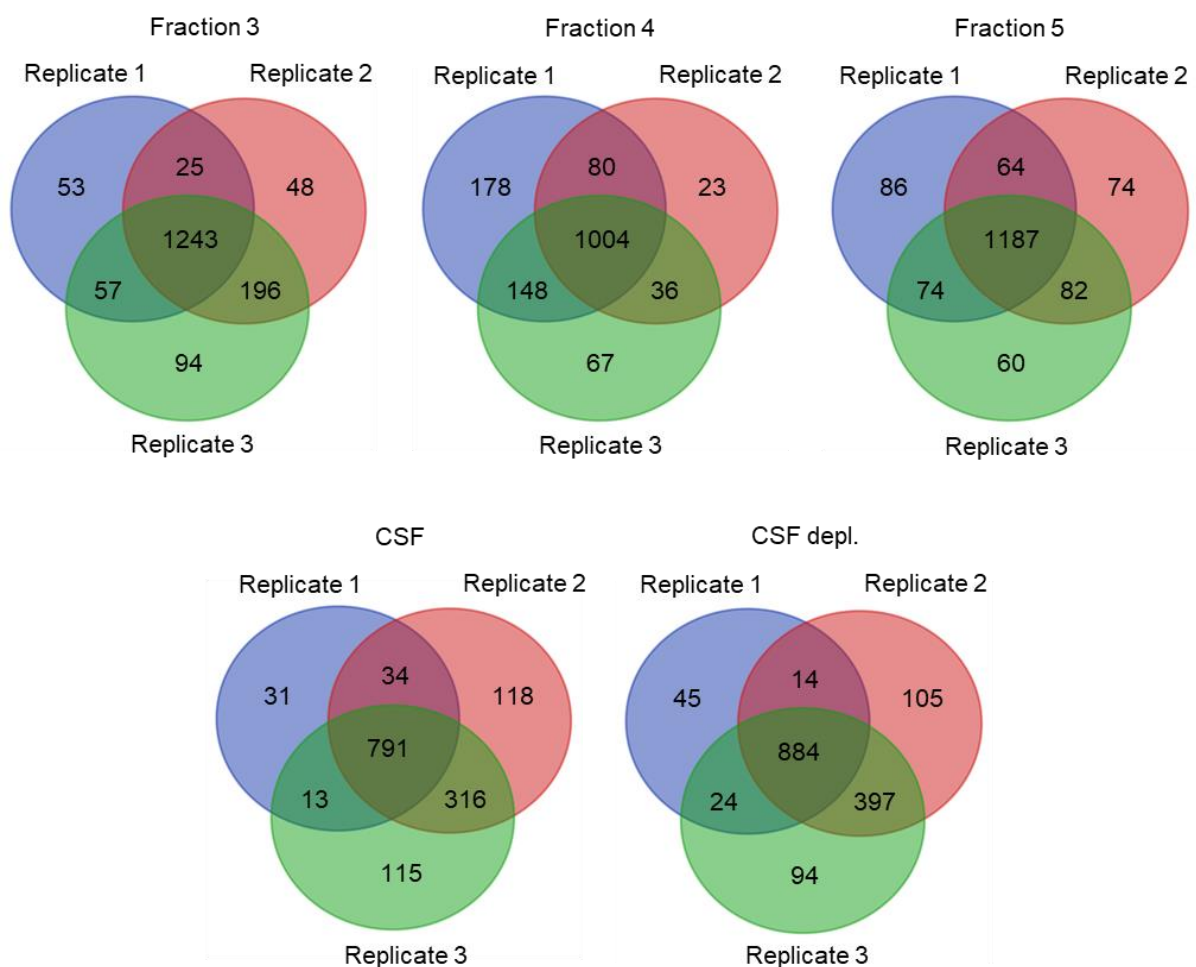

**Supplementary figure S1:** Venn diagrams of the identified proteins for each replicate of fractions 3-5 as well as CSF and CSF depl. Protein identification was done with 'matches between runs' active in MaxQuant. Abbreviations: CSF = cerebrospinal fluid, CSF depl. = CSF with depletion of highest abundant plasma proteins

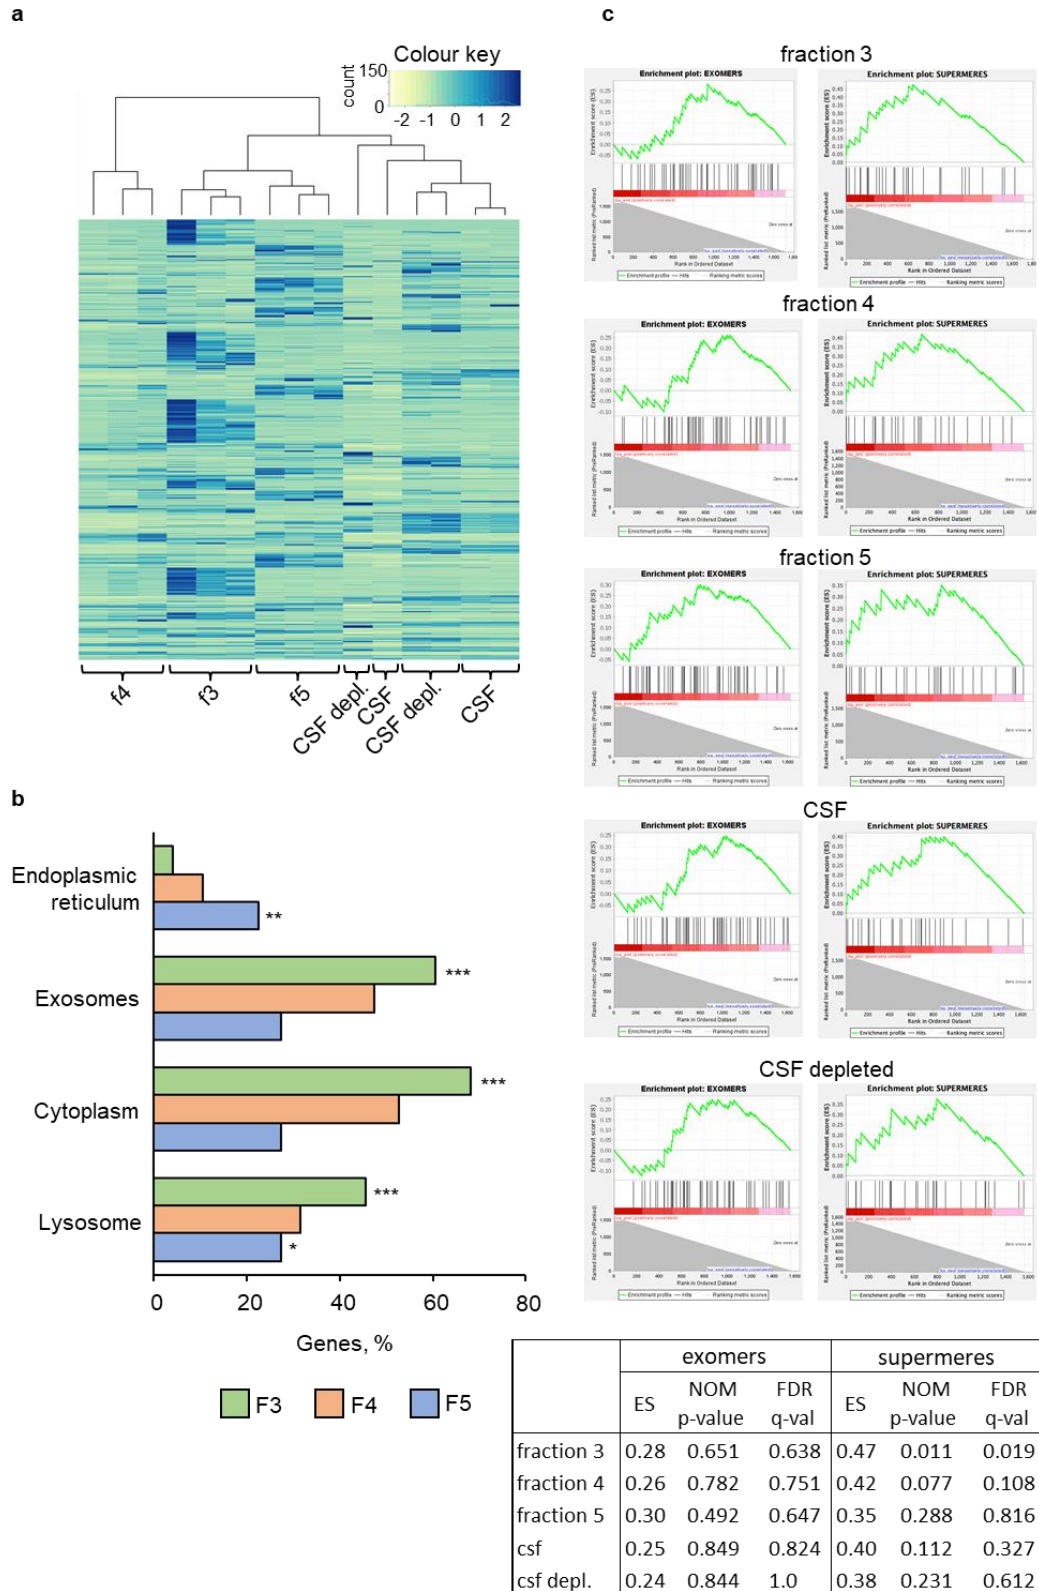

**Supplementary figure S2: a.** Heatmap with clustering of all the proteins found in the samples. **b.** Pathway analysis of chosen cellular components of proteins unique to SEC fractions 3-5 using FunRich. **c.** GSEA of protein list for exomers and supermeres. Abbreviations: SEC = size-exclusion chromatography, GSEA = gene set enrichment analysis, CSF = cerebrospinal fluid, CSF depl. = CSF with depletion of highest abundant plasma proteins. \* $p \leq 0.05$ , \*\* $p \leq 0.01$ , \*\*\* $p \leq 0.001$ .

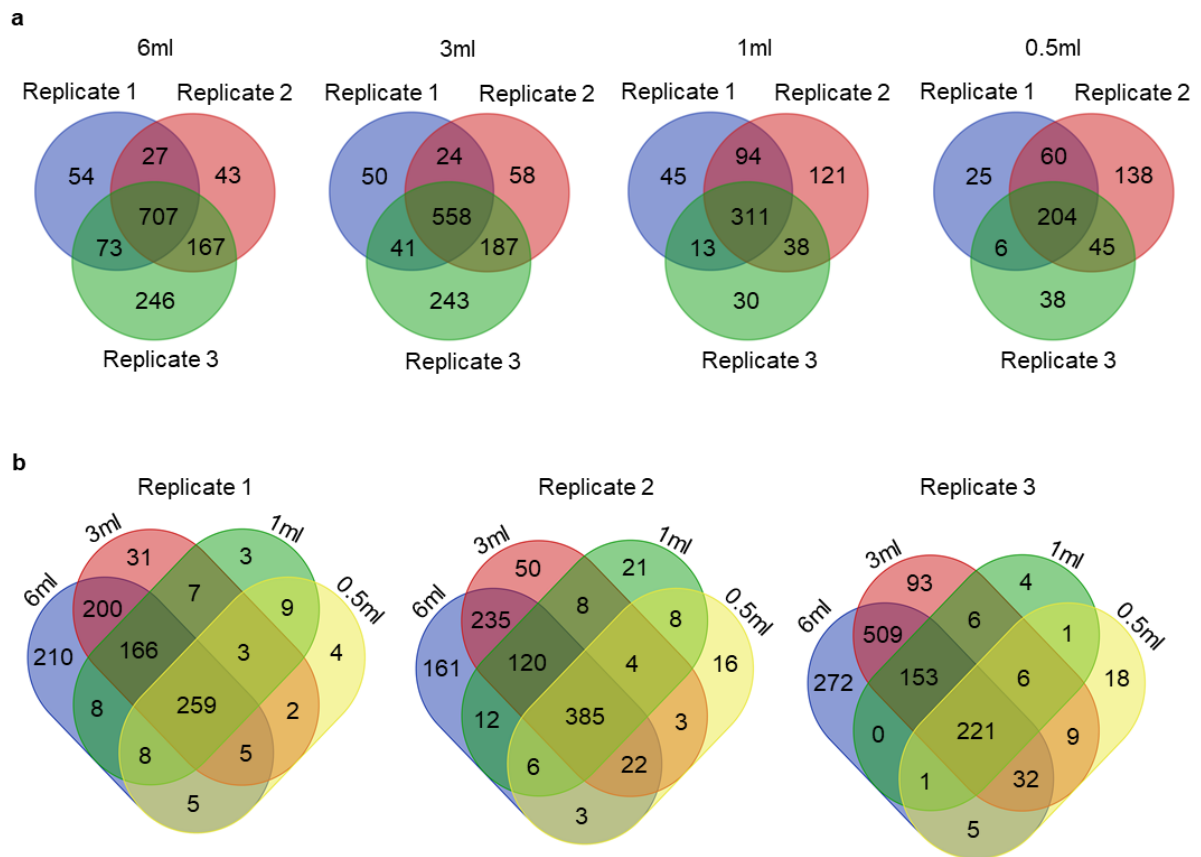

**Supplementary figure S3: a.** Shared proteins for the different starting volumes in each proteomics replicate. **b.** Shows the shared proteins between the different starting volumes in each proteomics replicate. Identification was done without the 'matches between runs' active in MaxQuant.

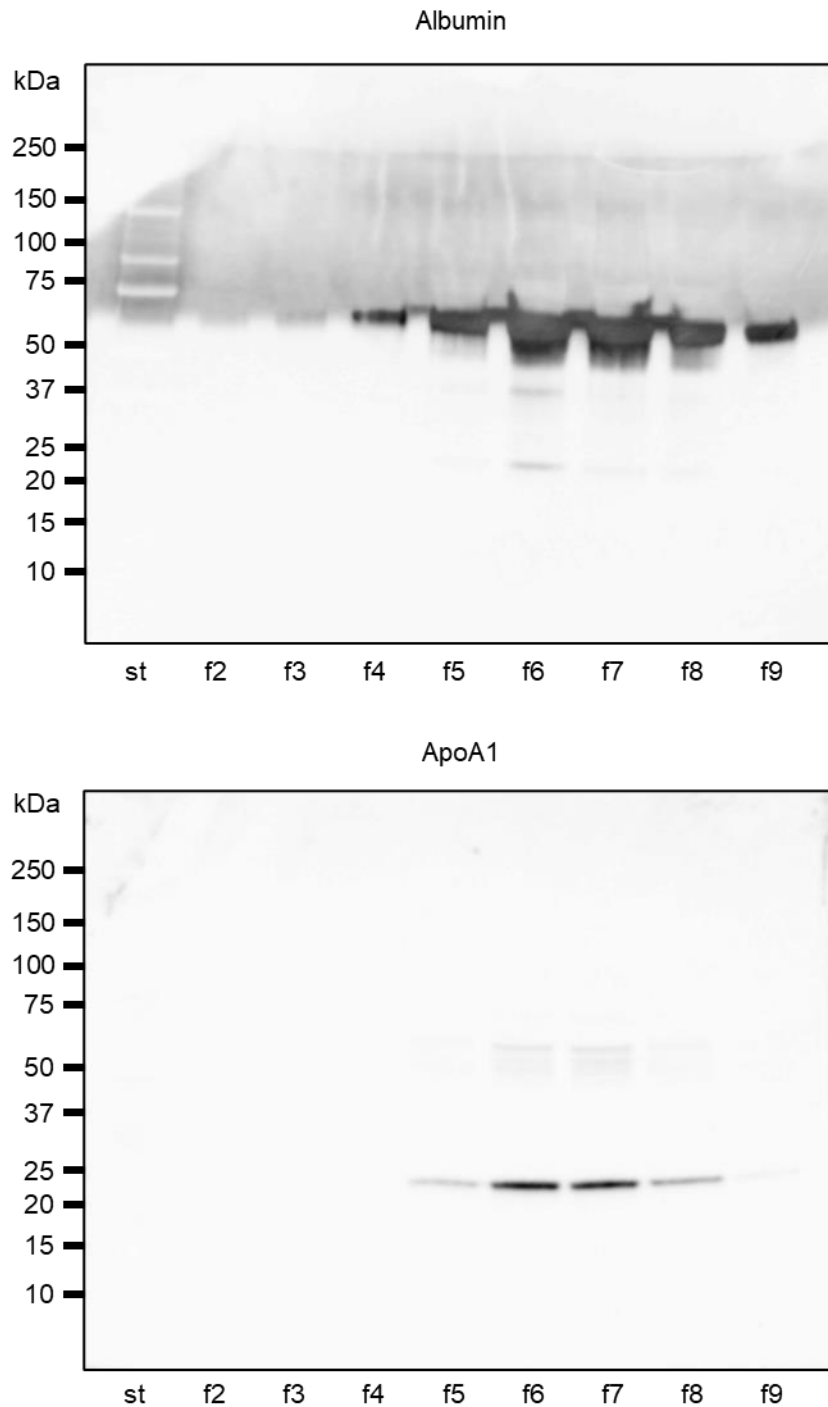

**Supplementary figure S4:** Uncropped Western blots of CSF SEC fractions 2-9 against Albumin and ApoA1. Abbreviations: CSF = cerebrospinal fluid, SEC = size-exclusion chromatography, st = Precision Plus Protein Dual Color Standards (#1610374, Bio-Rad Laboratories, Hercules, California, United States)

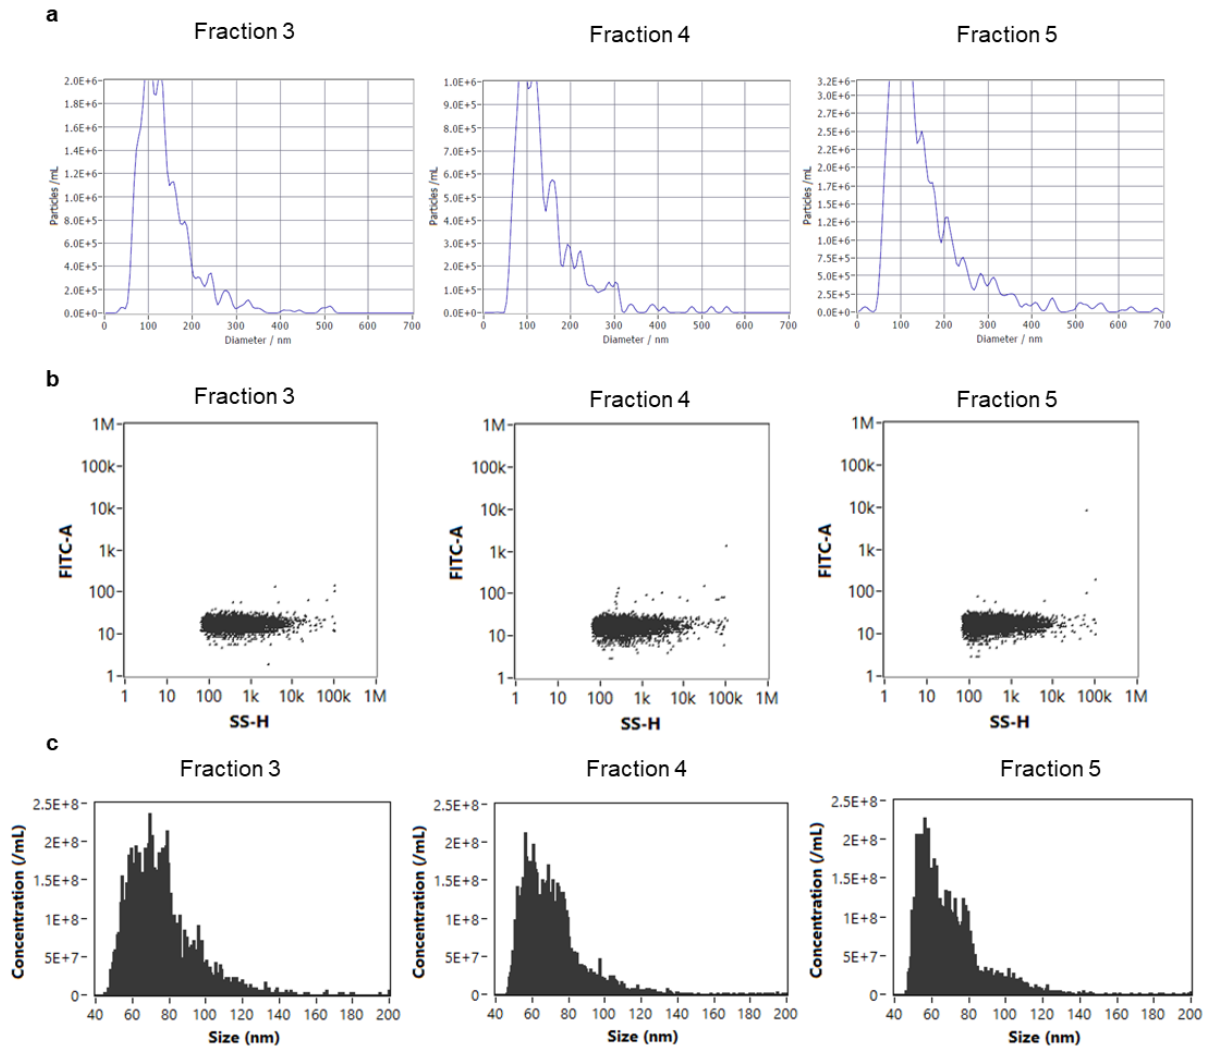

**Supplementary figure S5:** **a.** Raw data of nanoparticle analysis measurements of CSF SEC fractions 3-5. **b.** Raw data of NanoFCM measurements of CSF SEC fractions 3-5. **c.** Size and concentration raw data of CSF SEC fractions 3-5. Abbreviations: CSF = cerebrospinal fluid, SEC = size-exclusion chromatography, NanoFCM = nano-flow cytometry.
